# Supplementary material for: Novel Antibacterial Polyglycidols: Relationship between Structure and Properties
Source: PubMed Central journal article supplement (PMC6414948; doi:10.3390/polym10010096), 2018-01-20
Supplement: polymers-10-00096-s001.pdf [file polymers-10-00096-s001.pdf]

# Supporting Information

## Novel antimicrobial polyglycidols: relationship between structure and properties

Fabian Marquardt, Cornelia Stöcker, Rita Gartzten, Elisabeth Heine, Helmut Keul\*, Martin Möller\*

Institute of Technical and Macromolecular Chemistry, RWTH Aachen University and DWI-Leibniz-Institute for Interactive Materials, Forckenbeckstr. 50, D-52056 Aachen, Germany; Marquardt@dwi.rwth-aachen.de (F. M.); Cornelia.stoecker@rwth-aachen.de (C. S.); Gartzten@dwi.rwth-aachen.de (R. G.); Heine@dwi.rwth-aachen.de (E. H.)

\* Correspondence: Keul@dwi.rwth-aachen.de (H. K.); Moeller@dwi.rwth-aachen.de (M. M.)

### 1. Synthesis of linear polyglycidol (1)

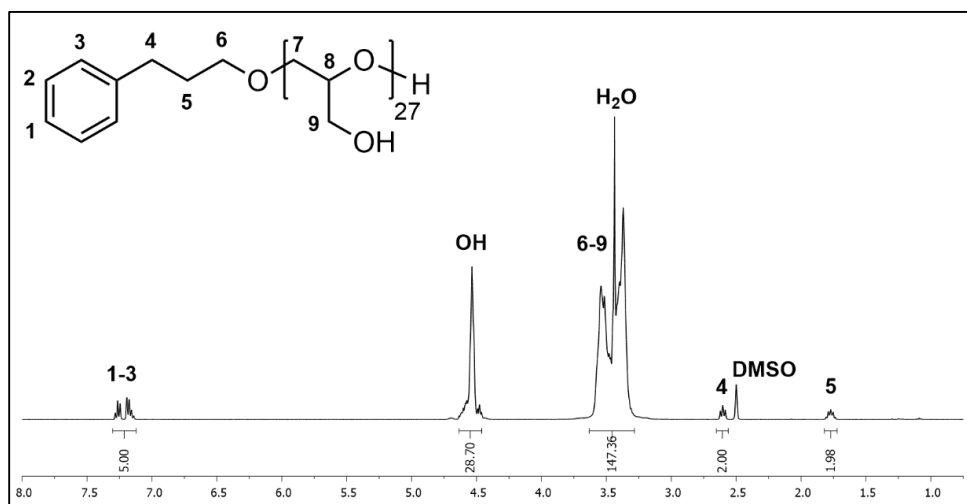

Figure S1. <sup>1</sup>H NMR spectrum of PG<sub>27</sub> (1) measured in DMSO-*d*<sub>6</sub>.

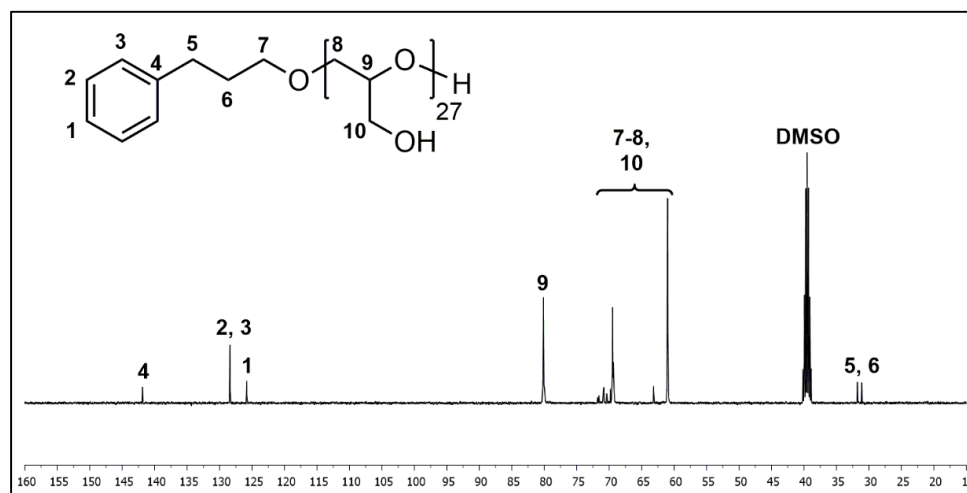

Figure S2. <sup>13</sup>C NMR spectrum of PG<sub>27</sub> (1) measured in DMSO-*d*<sub>6</sub>.

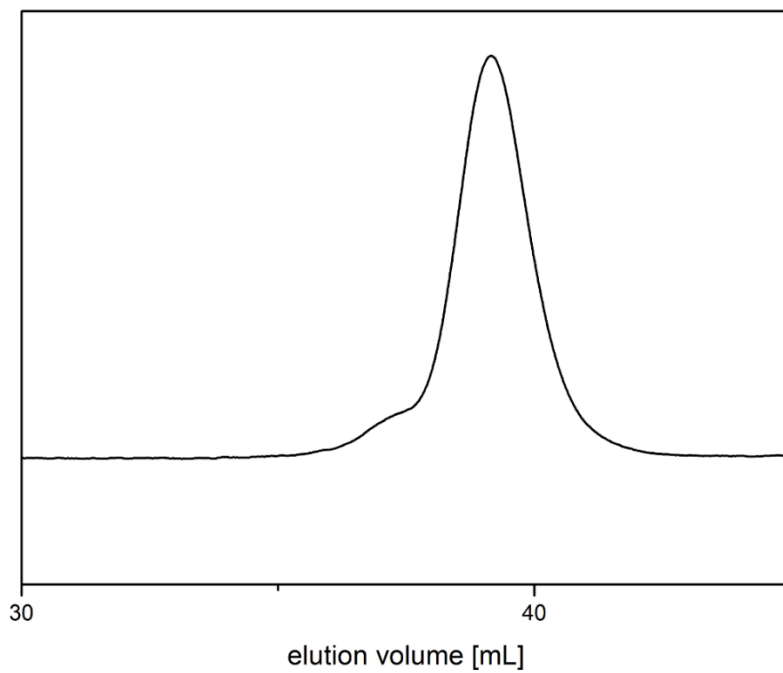

**Figure S3.** DMF-SEC traces of PG<sub>27</sub> (1).

## 2. Synthetic pathway

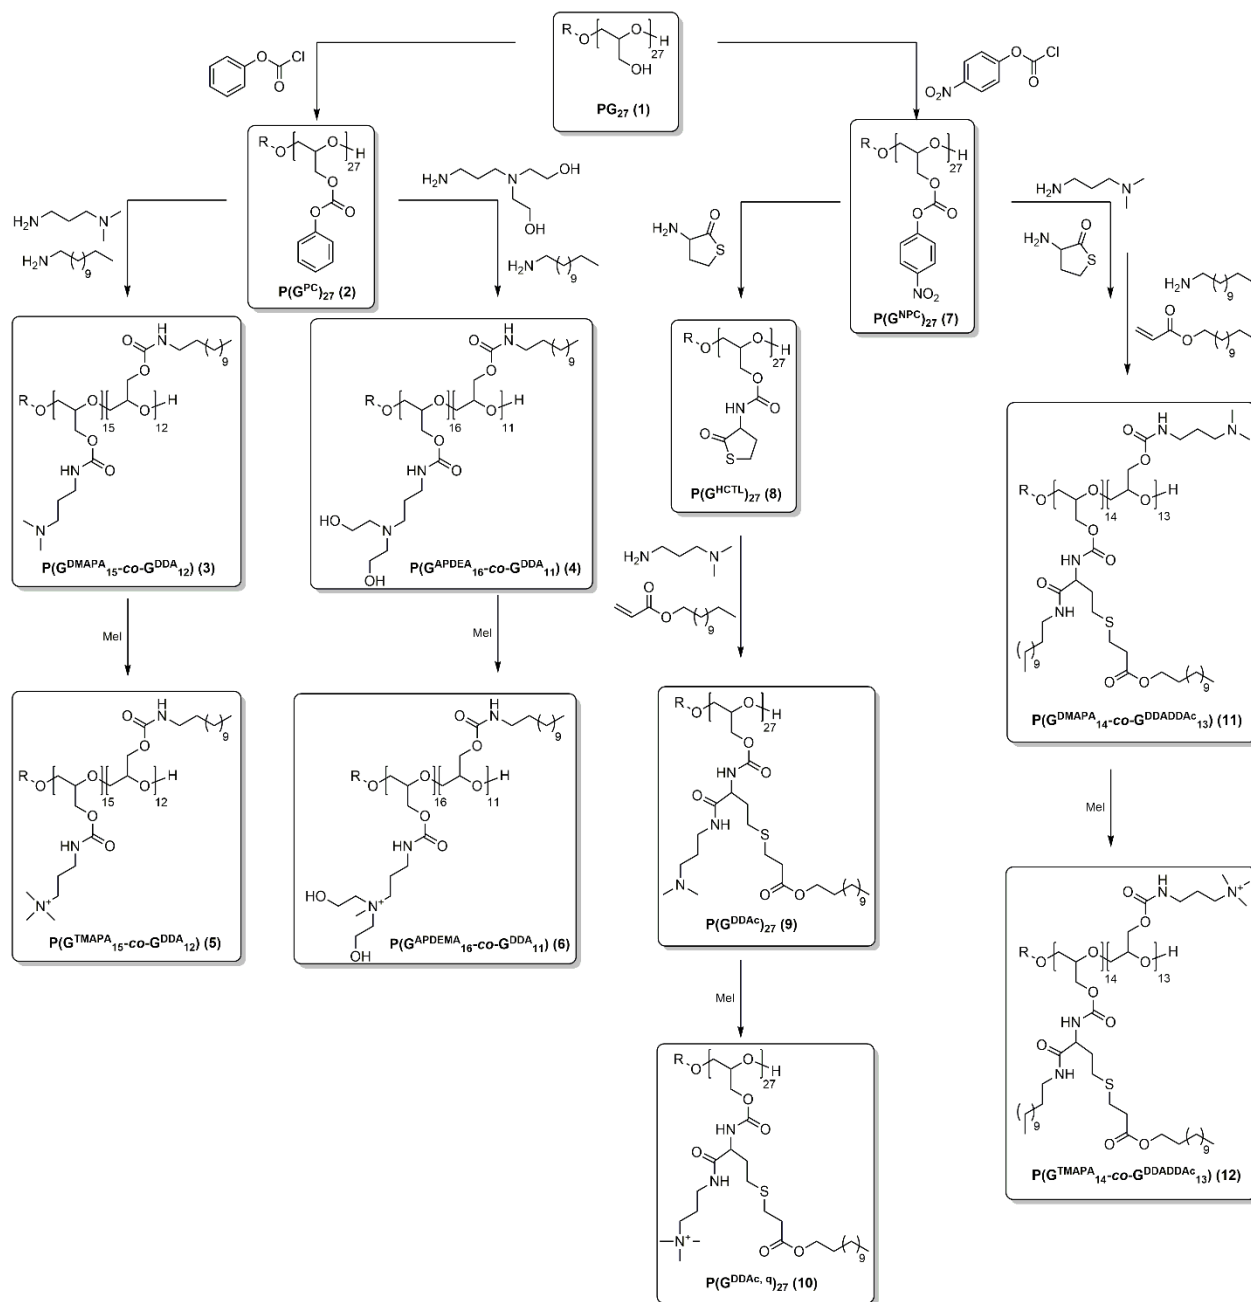

**Scheme S1:** Synthetic pathway to  $\text{P}(\text{GTMAPA}_{15}\text{-co-GDDA}_{12})$  (5),  $\text{P}(\text{GAPDEMA}_{16}\text{-co-GDDA}_{11})$  (6),  $\text{P}(\text{GDDAc},q)_{27}$  (10) and  $\text{P}(\text{GTMAPA}_{14}\text{-co-GDDADDAc}_{13})$  (12).

3. Synthesis of P(G<sup>TMAPA</sup><sub>15</sub>-CO-G<sup>DDA</sup><sub>12</sub>) (5) and P(G<sup>APDEMA</sup><sub>16</sub>-CO-G<sup>DDA</sup><sub>11</sub>) (6)

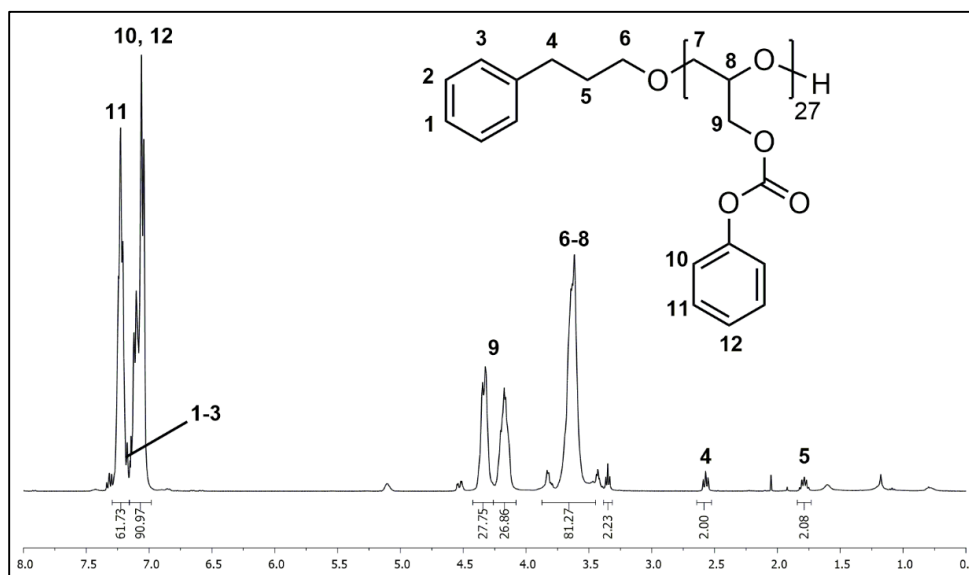

Figure S4. <sup>1</sup>H NMR spectrum of P(G<sup>PC</sup>)<sub>27</sub> (2) measured in CDCl<sub>3</sub>.

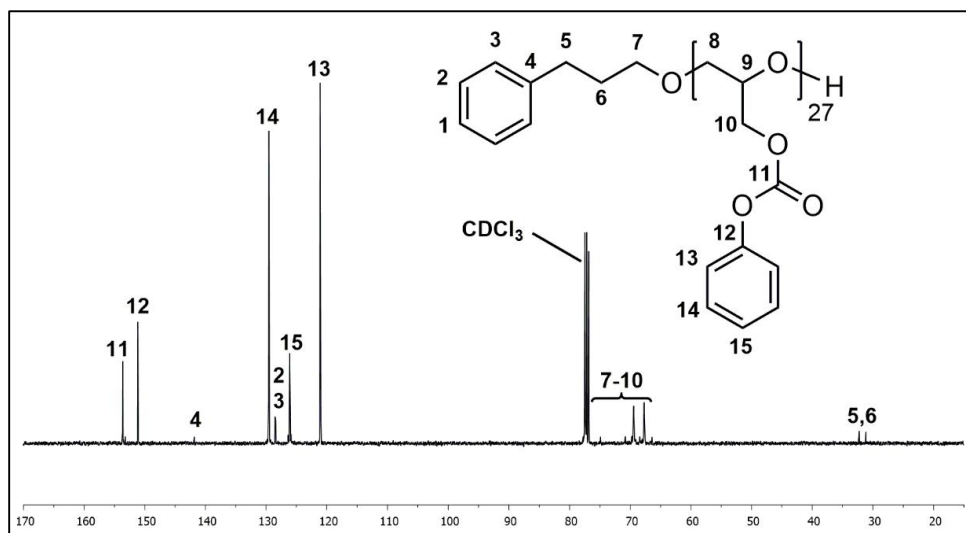

Figure S5. <sup>13</sup>C NMR spectrum of P(G<sup>PC</sup>)<sub>27</sub> (2) measured in CDCl<sub>3</sub>.

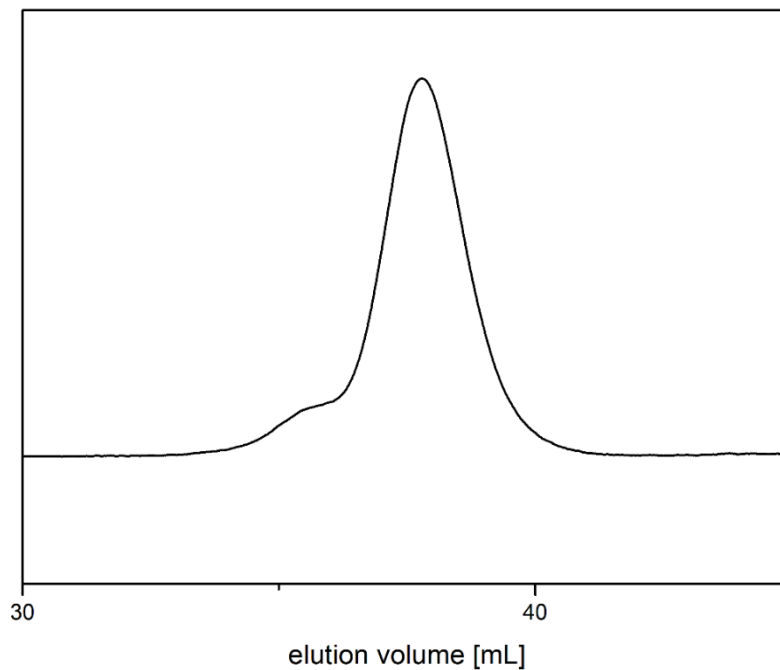

Figure S6. DMF-SEC traces of P(G<sup>PC</sup>)<sub>27</sub> (2).

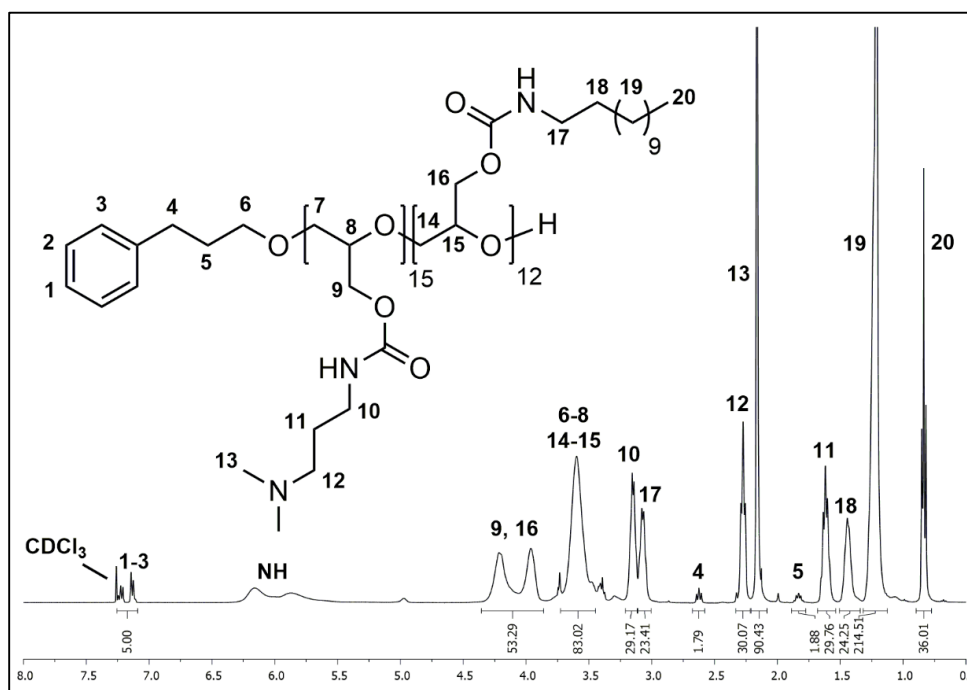

Figure S7. <sup>1</sup>H NMR spectrum of P(G<sup>DMAPA</sup><sub>15</sub>-co-G<sup>DDA</sup><sub>12</sub>) (3) measured in CDCl<sub>3</sub>.

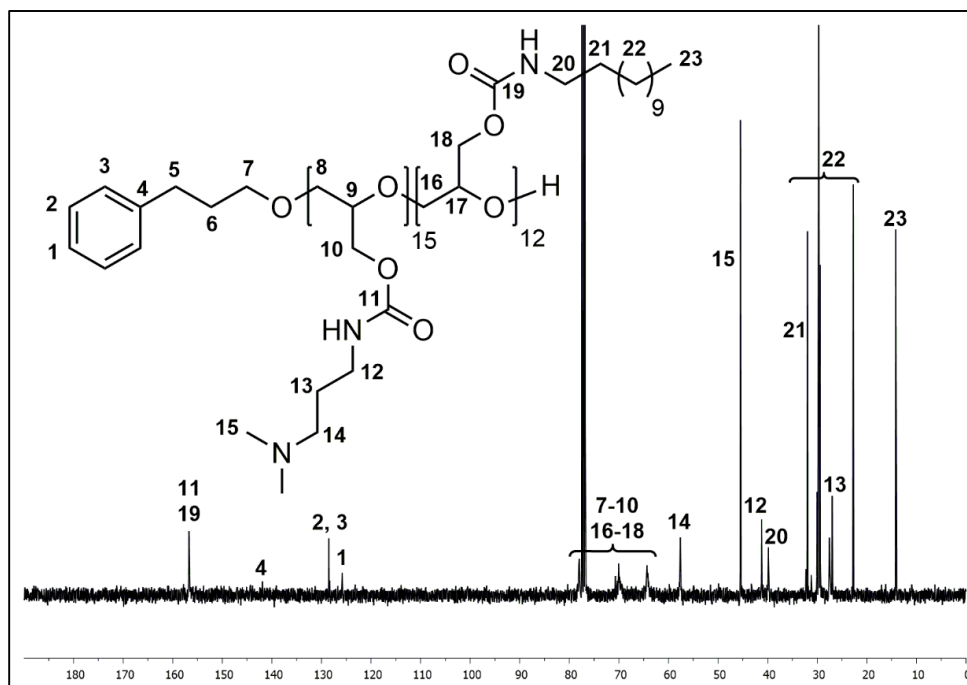

Figure S8. <sup>13</sup>C NMR spectrum of P(GDMA<sub>15</sub>-co-GDDA<sub>12</sub>) (3) measured in CDCl<sub>3</sub>.

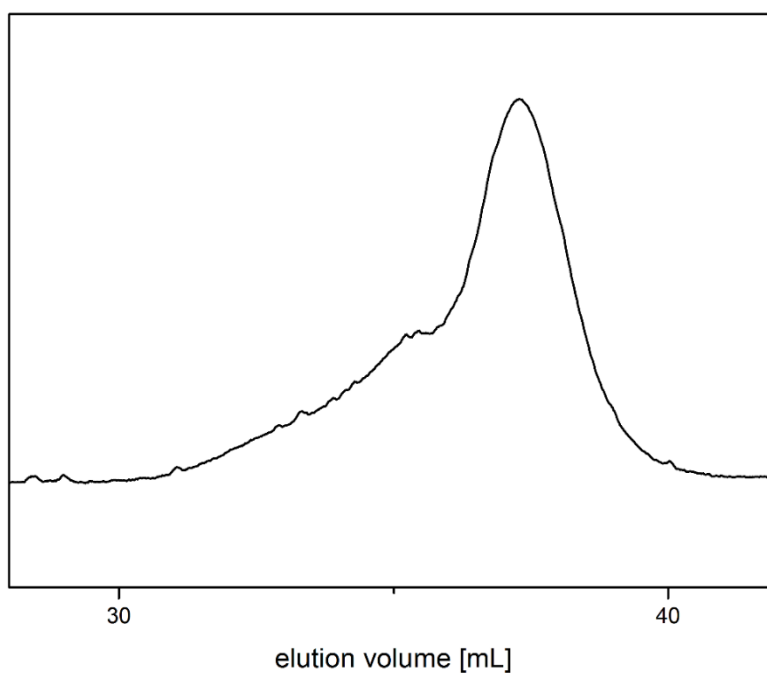

Figure S9. DMF-SEC traces of P(GDMA<sub>15</sub>-co-GDDA<sub>12</sub>) (3).

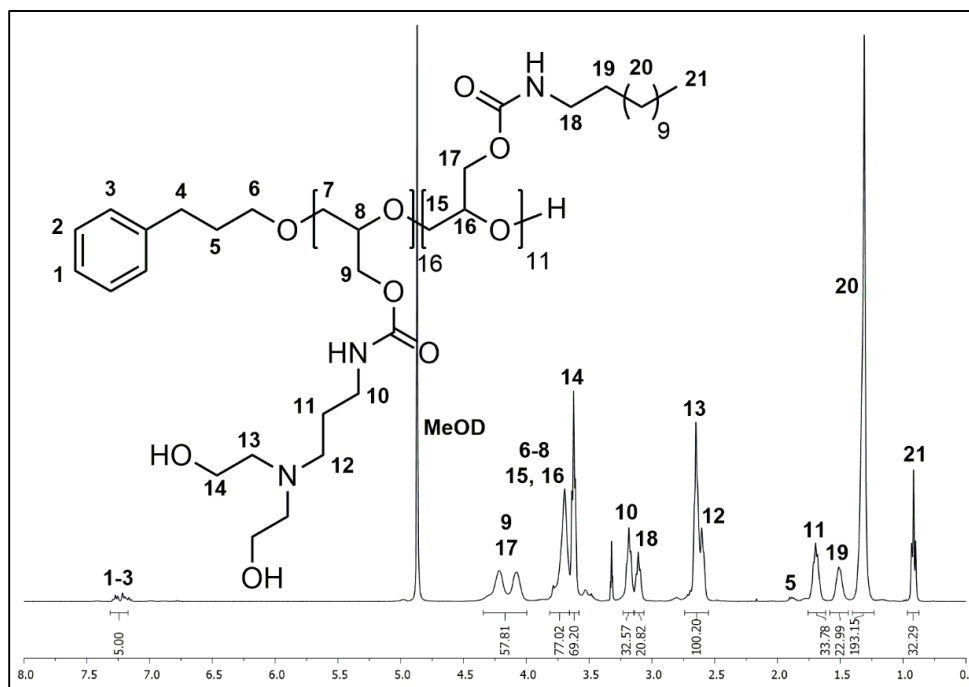

Figure S10. <sup>1</sup>H NMR spectrum of P(G<sup>APDEA</sup><sub>16-co</sub>-G<sup>DDA</sup><sub>11</sub>) (4) measured in MeOD.

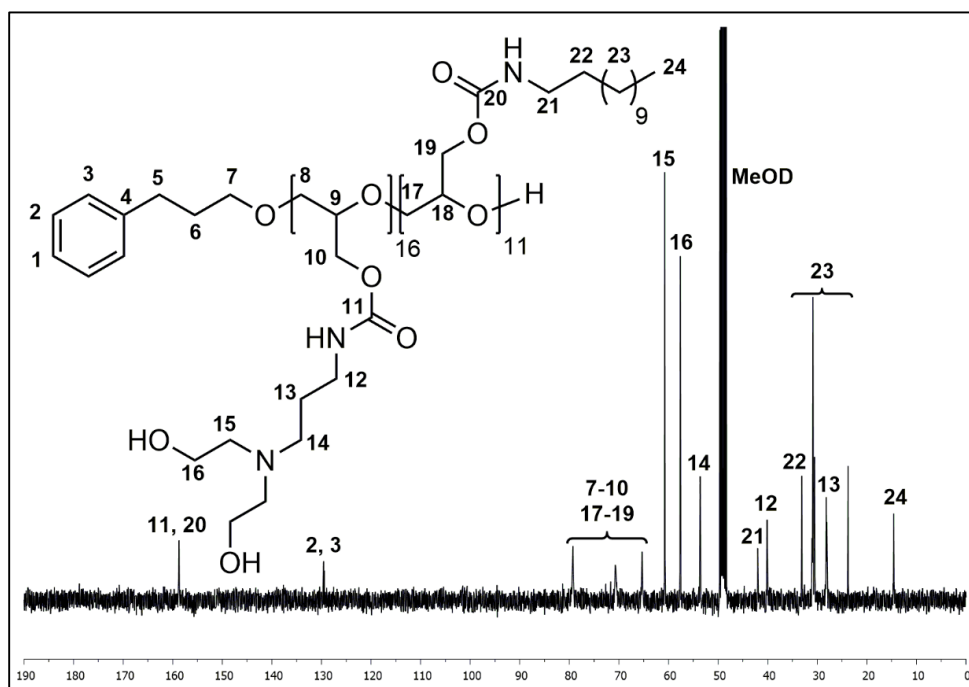

Figure S11. <sup>13</sup>C NMR spectrum of P(G<sup>APDEA</sup><sub>16-co</sub>-G<sup>DDA</sup><sub>11</sub>) (4) measured in MeOD.

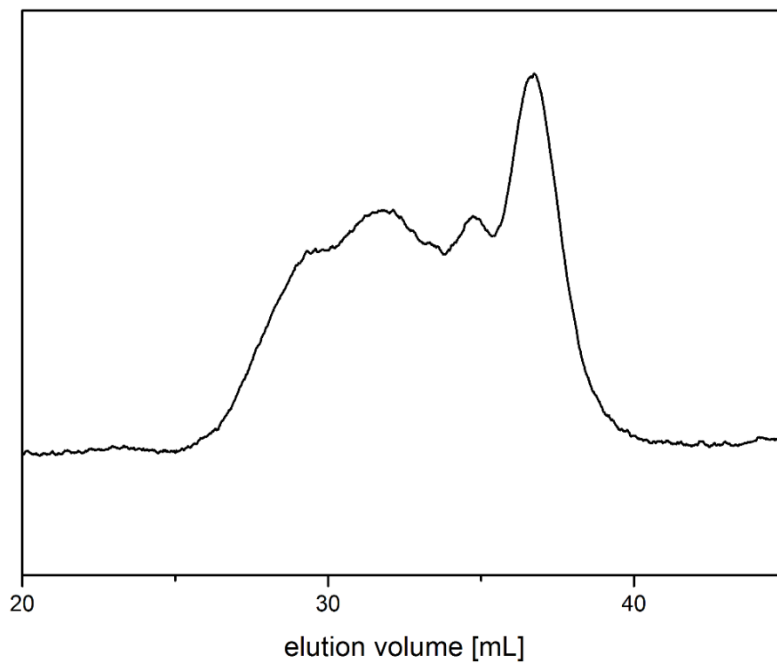

**Figure S12.** DMF-SEC traces of P(GAPDEA<sub>16</sub>-CO-GDDA<sub>11</sub>) (4).

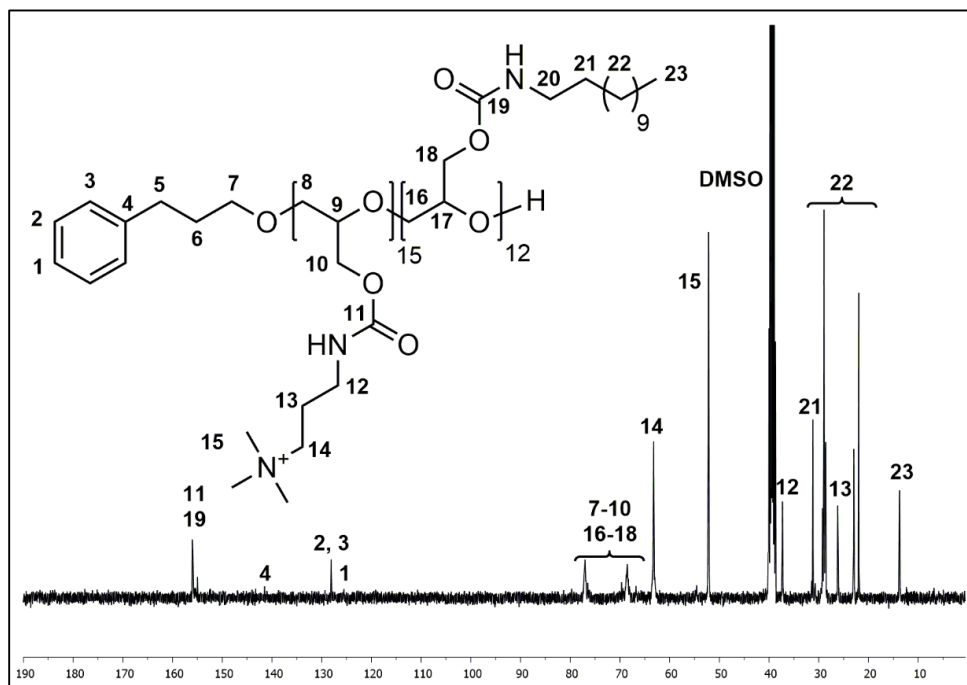

**Figure S13.** <sup>13</sup>C NMR spectrum of P(GTMAPA<sub>15</sub>-CO-GDDA<sub>12</sub>) (5) measured in DMSO-*d*<sub>6</sub>.



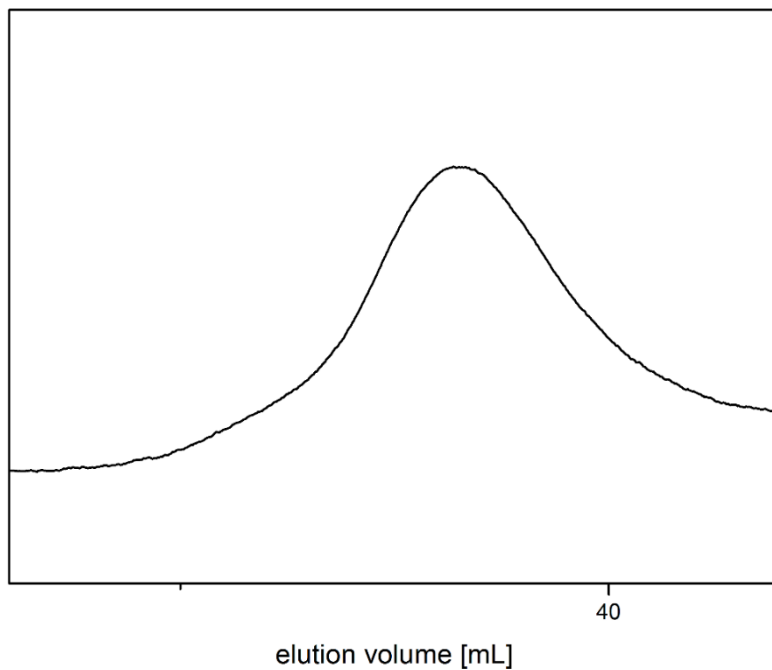

Figure S14. DMF-SEC traces of P(G<sup>TMAPA</sup><sub>15</sub>-CO-G<sup>DDA</sup><sub>12</sub>) (5).

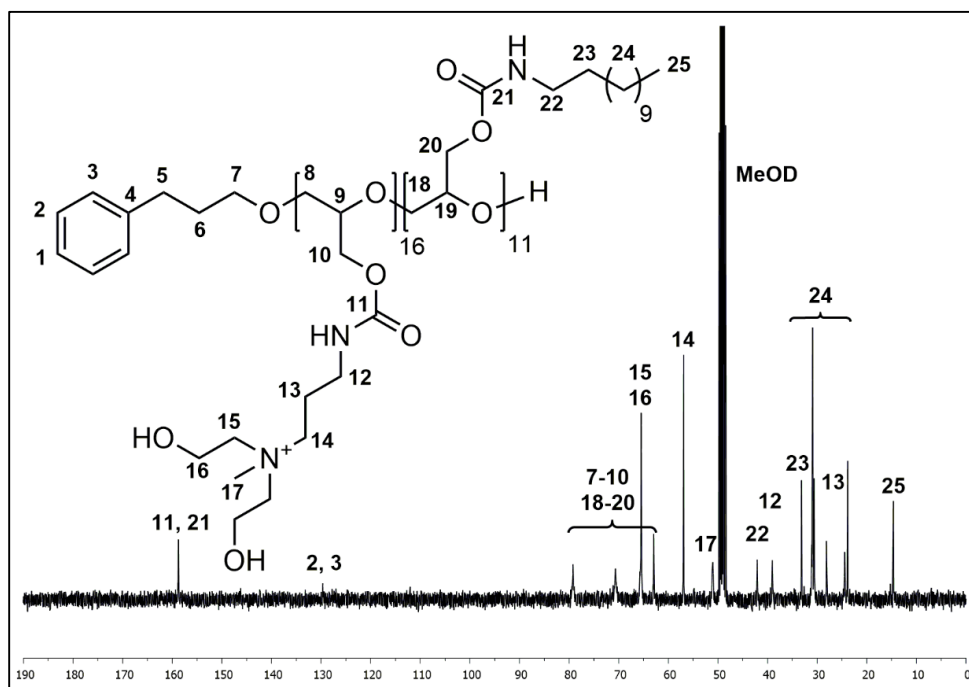

Figure S15. <sup>13</sup>C NMR spectrum of P(G<sup>APDEMA</sup><sub>16</sub>-CO-G<sup>DDA</sup><sub>11</sub>) (6) measured in MeOD.

#### 4. Synthesis of P(G<sup>DDAc</sup>, q)<sub>27</sub> (10)

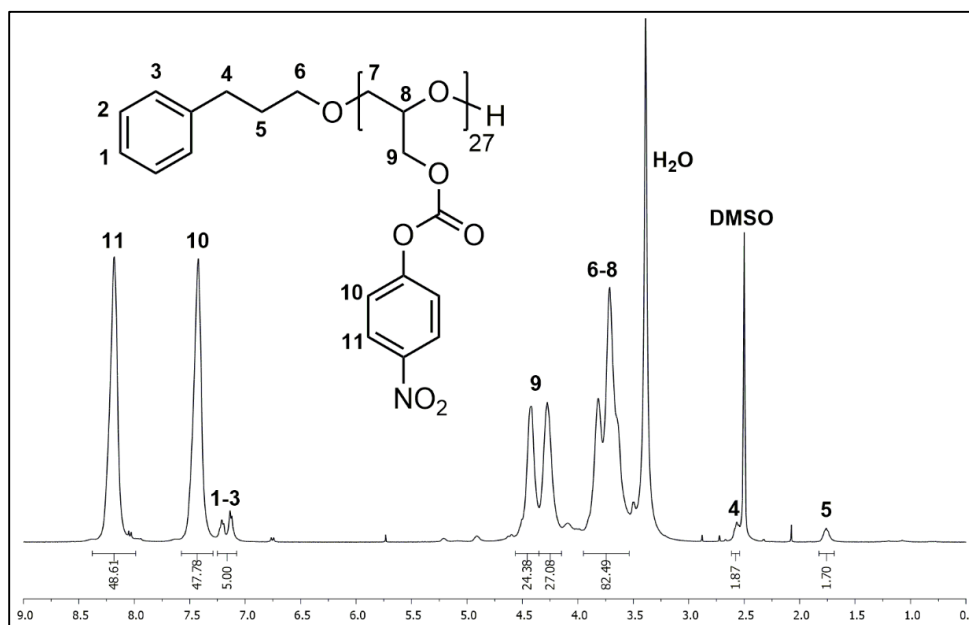

Figure S16. <sup>1</sup>H NMR spectrum of P(G<sup>NPC</sup>)<sub>27</sub> (7) measured in DMSO-*d*<sub>6</sub>.

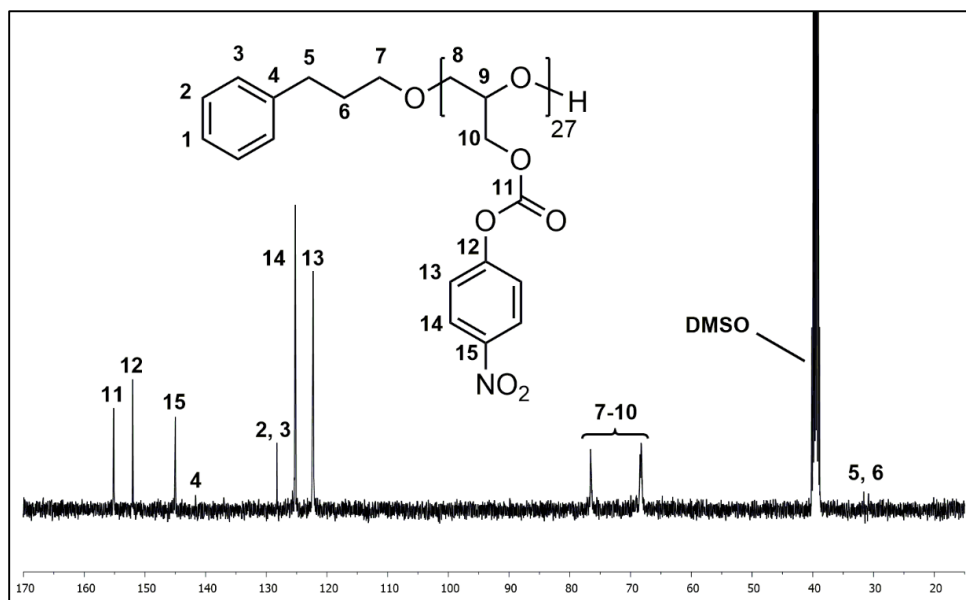

Figure S17. <sup>13</sup>C NMR spectrum of P(G<sup>NPC</sup>)<sub>27</sub> (7) measured in DMSO-*d*<sub>6</sub>.

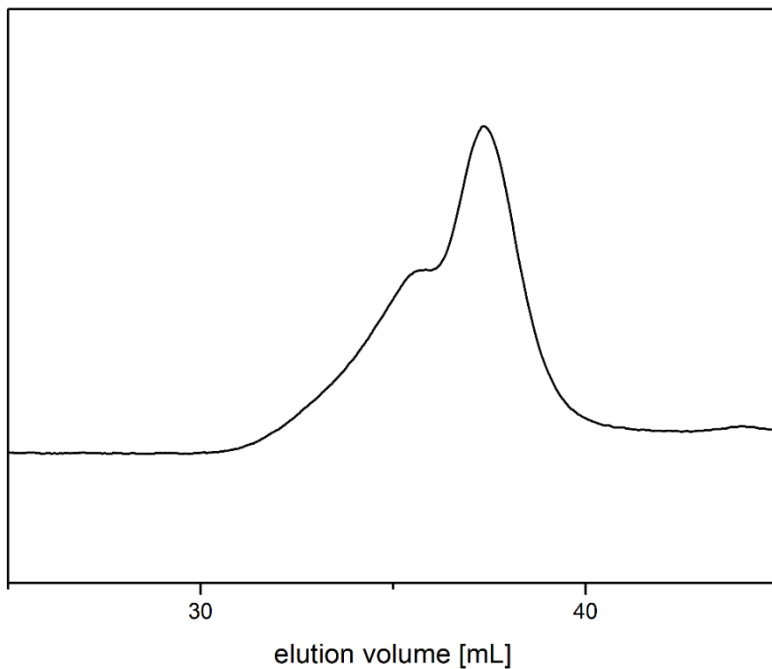

Figure S18. DMF-SEC traces of P(G<sup>NPC</sup>)<sub>27</sub> (7).

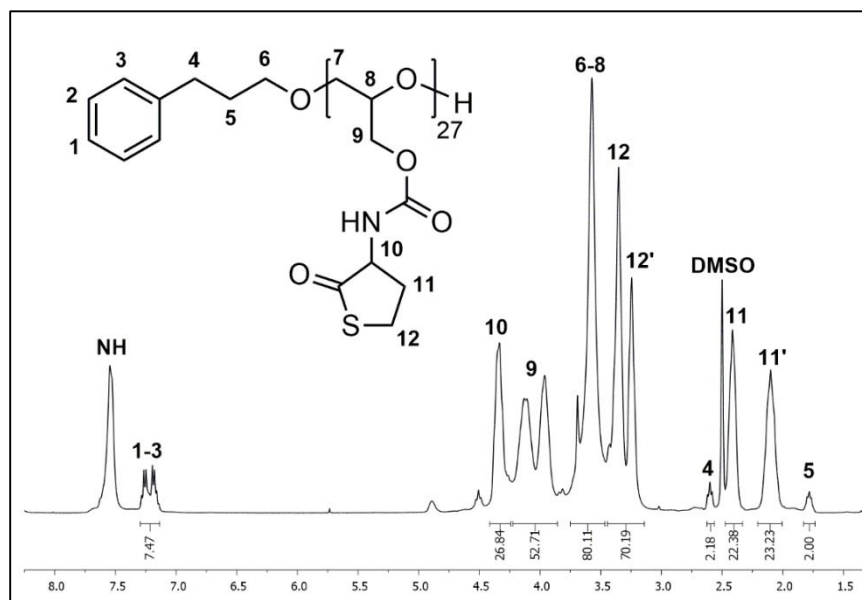

Figure S19. <sup>1</sup>H NMR spectrum of P(G<sup>HCTL</sup>)<sub>27</sub> (8) measured in DMSO-*d*<sub>6</sub>.

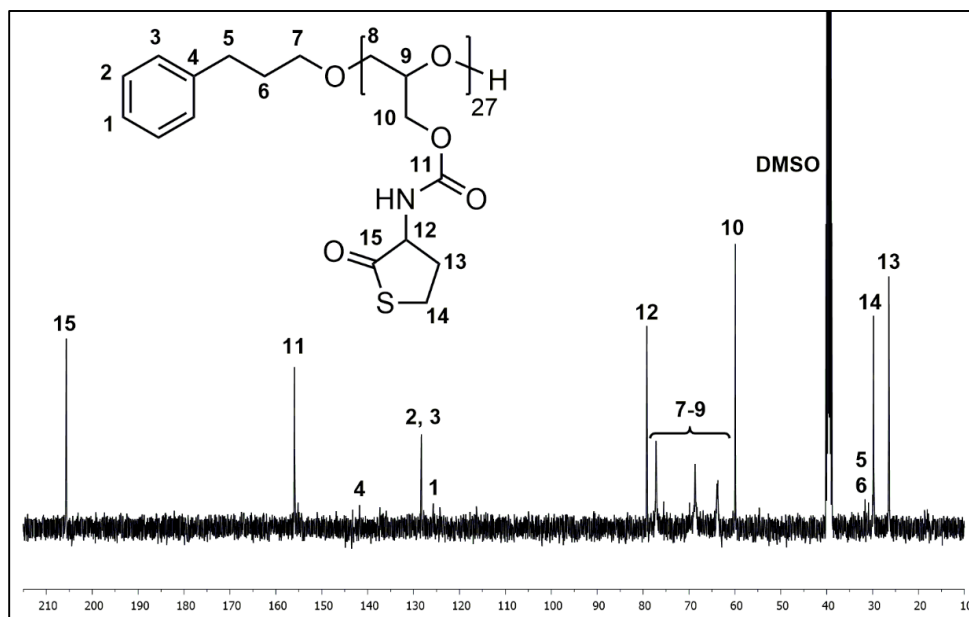

Figure S20.  $^{13}\text{C}$  NMR spectrum of  $\text{P}(\text{G}^{\text{HCTL}})_{27}$  (8) measured in  $\text{DMSO-}d_6$ .

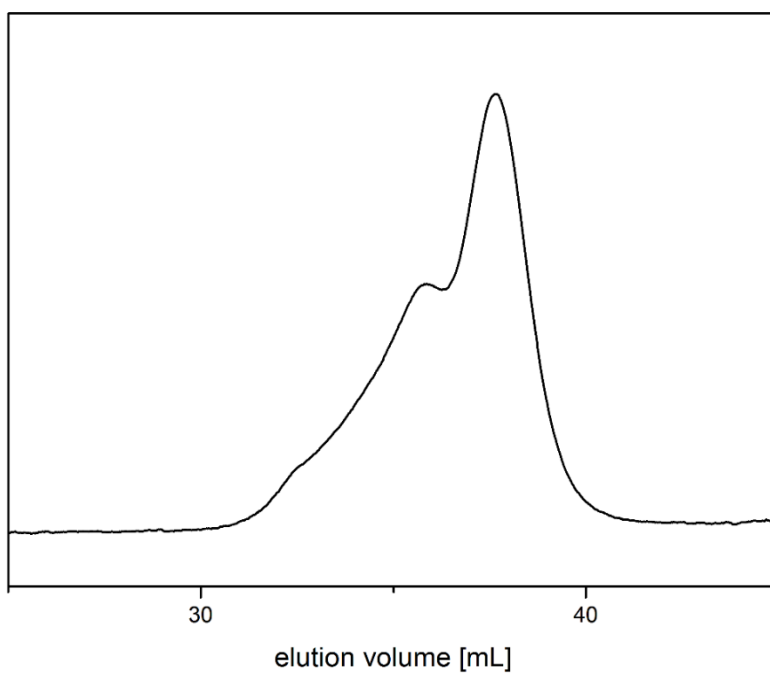

Figure S21. DMF-SEC traces of  $\text{P}(\text{G}^{\text{HCTL}})_{27}$  (8).

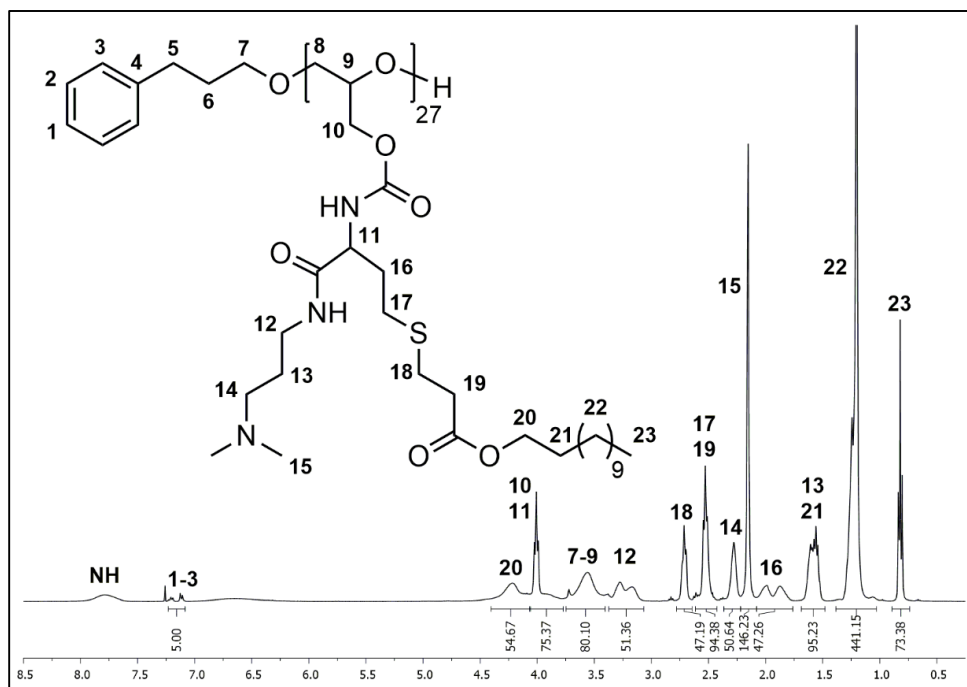

Figure S22.  $^1\text{H}$  NMR spectrum of  $\text{P}(\text{G}^{\text{DDAc}})_{27}$  (9) measured in  $\text{CDCl}_3$ .

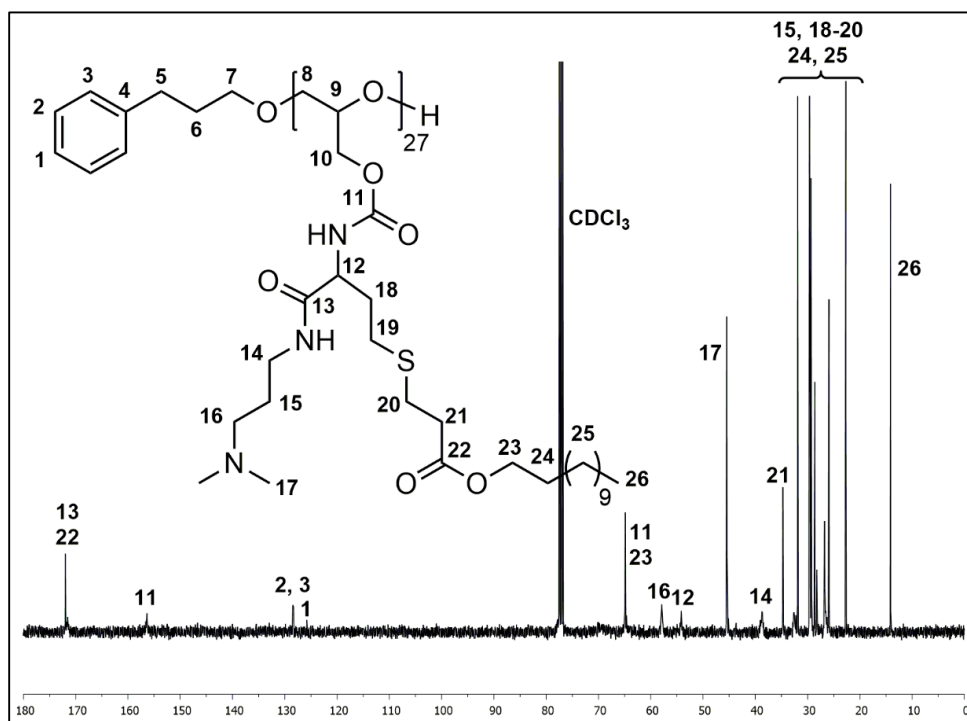

Figure S23.  $^{13}\text{C}$  NMR spectrum of  $\text{P}(\text{G}^{\text{DDAc}})_{27}$  (9) measured in  $\text{CDCl}_3$ .

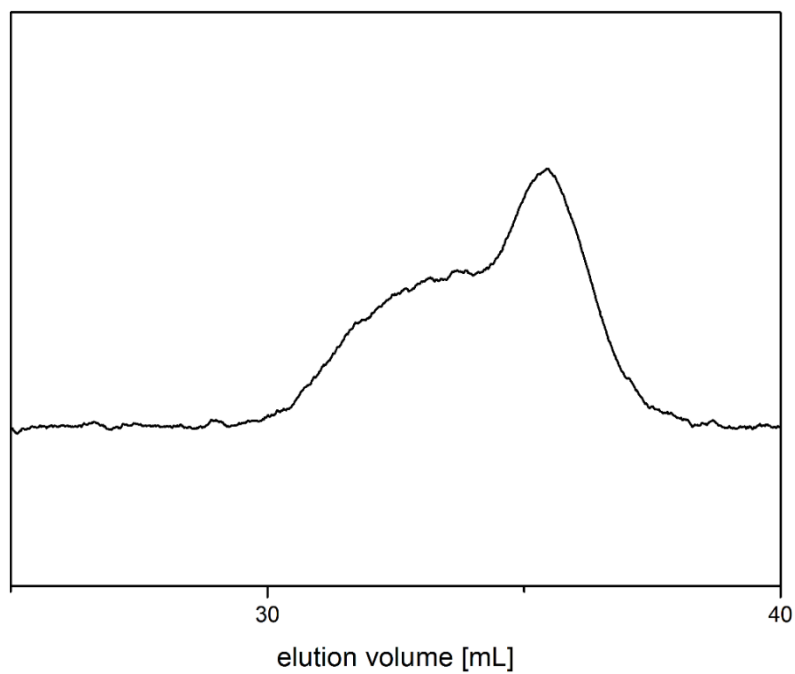

Figure S24. DMF-SEC traces of P(G<sup>DDAc</sup>)<sub>27</sub> (9).

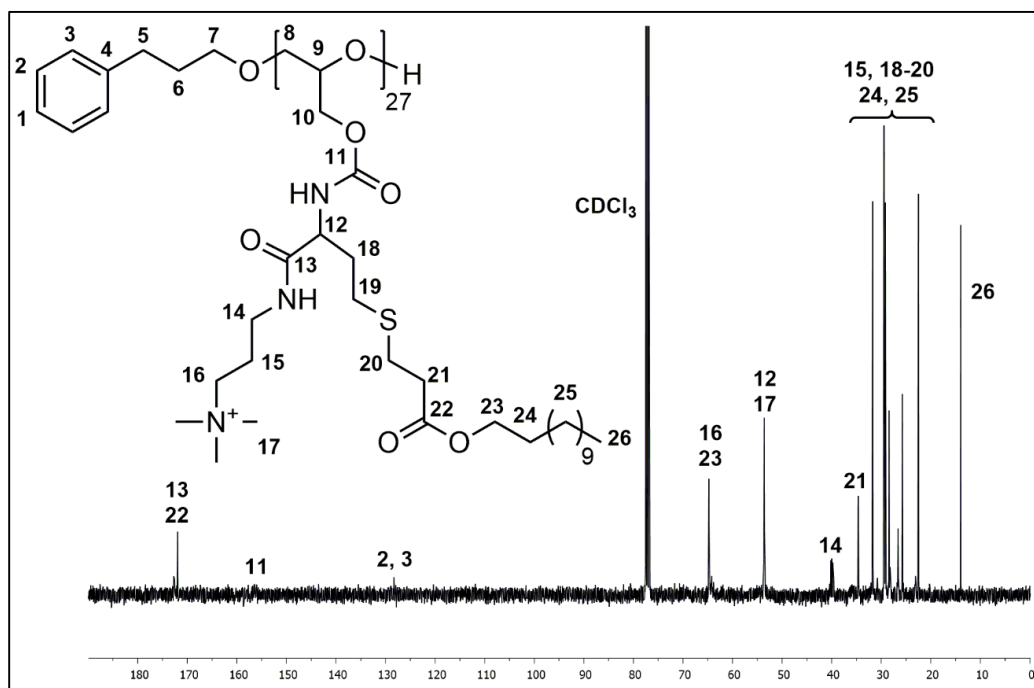

Figure S25. <sup>13</sup>C NMR spectrum of P(G<sup>DDAc, q</sup>)<sub>27</sub> (10) measured in CDCl<sub>3</sub>.

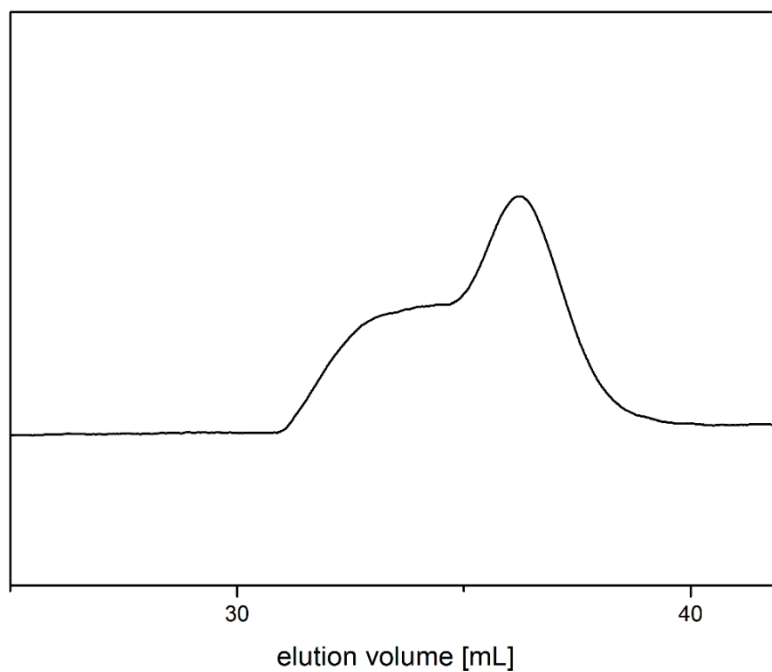

Figure S26. DMF-SEC traces of  $P(G^{DDAc, 9})_{27}$  (10).

### 5. Synthesis of $P(G^{TMAPA}_{14}-CO-G^{DDADDAc}_{13})$ (12)

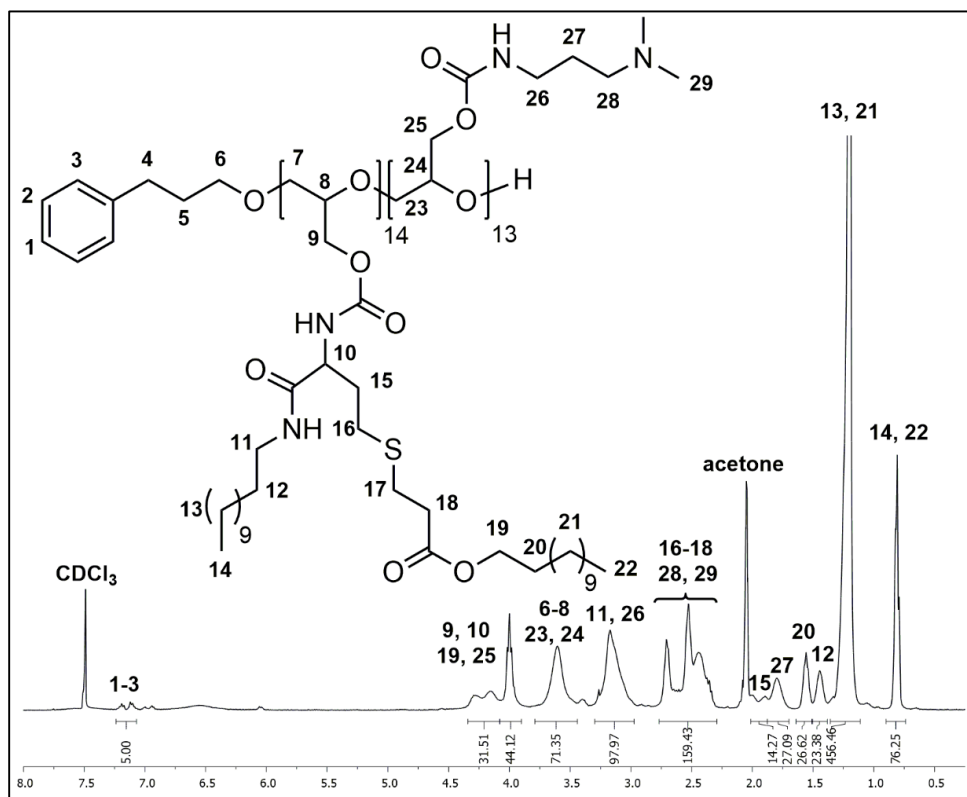

Figure S27.  $^1H$  NMR spectrum of  $P(G^{DMAPA}_{14}-CO-G^{DDADDAc}_{13})$  (11) measured in  $CDCl_3/acetone-d_6$ .

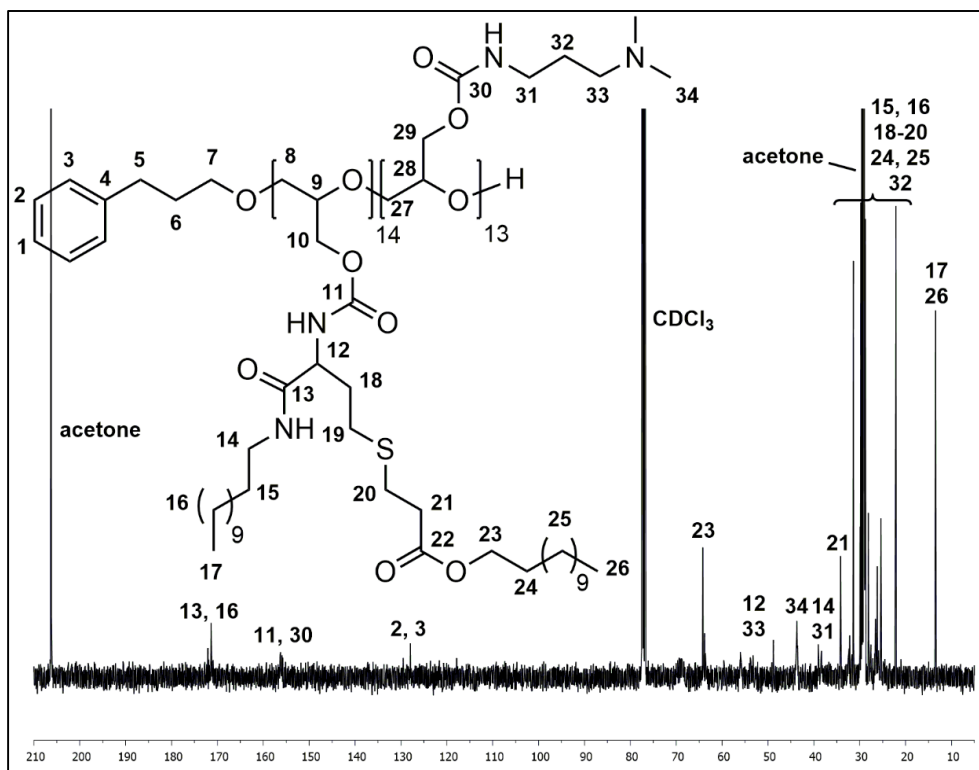

**Figure S28.**  $^{13}\text{C}$  NMR spectrum of  $\text{P}(\text{GDMA PA}_{14}\text{-CO-GDDADD Ac}_{13})$  (**11**) measured in  $\text{CDCl}_3/\text{acetone-}d_6$ .

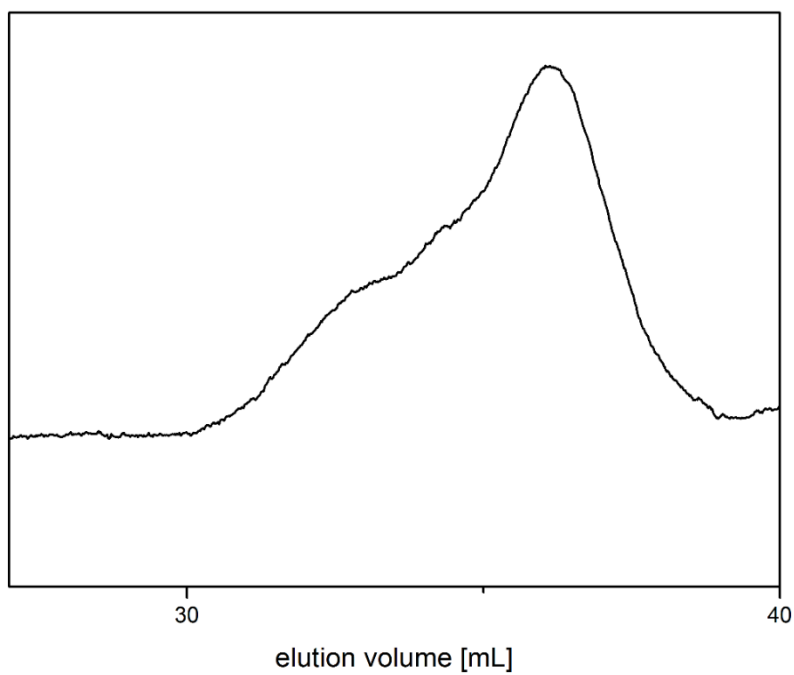

**Figure S29.** DMF-SEC traces of  $\text{P}(\text{GDMA PA}_{14}\text{-CO-GDDADD Ac}_{13})$  (**11**).



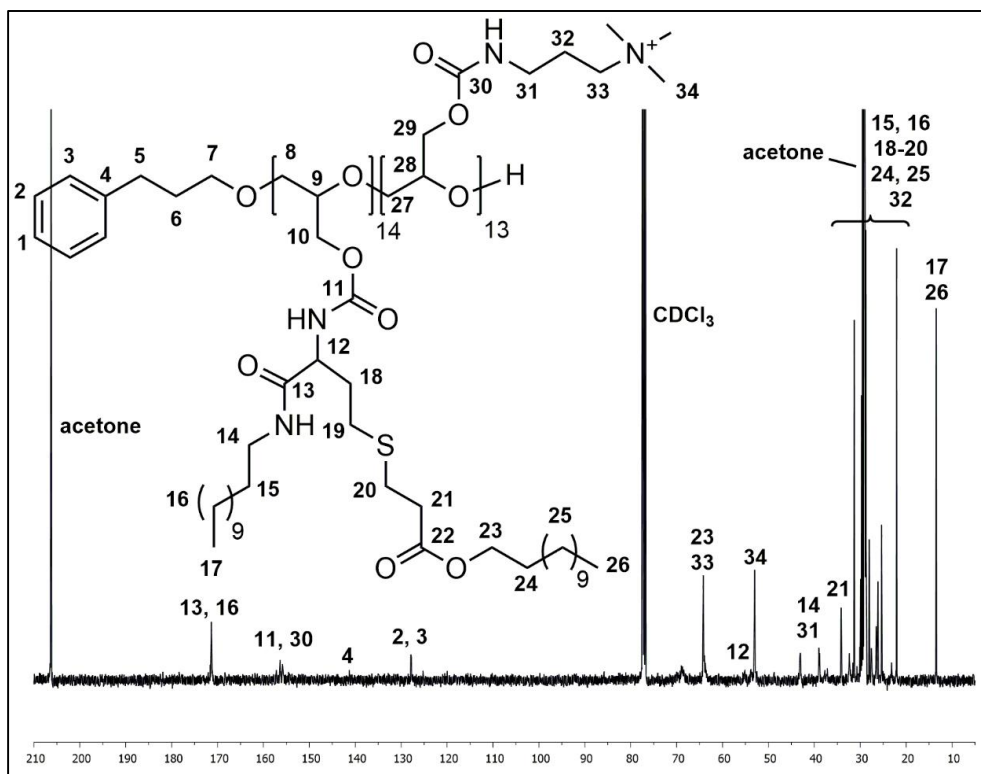

Figure S30. <sup>13</sup>C NMR spectrum of P(G<sup>TMAPA</sup><sub>14</sub>-CO-G<sup>DDADDA</sup><sub>c13</sub>) (12) measured in CDCl<sub>3</sub>/acetone-*d*<sub>6</sub>.

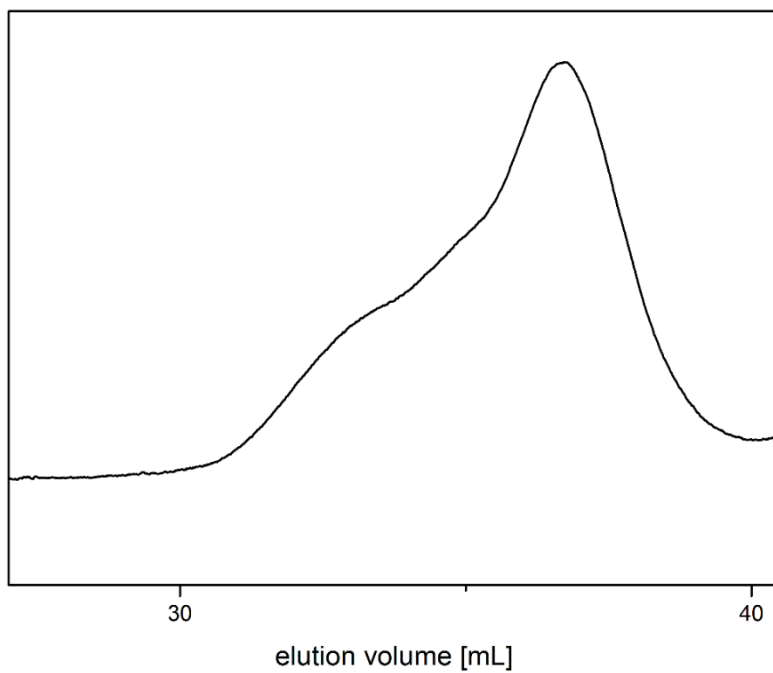

Figure S31. DMF-SEC traces of P(G<sup>TMAPA</sup><sub>14</sub>-CO-G<sup>DDADDA</sup><sub>c13</sub>) (12).
